# Supplementary material for: Uncovering the multifaceted roles of nitrogen defects in graphitic carbon nitride for selective photocatalytic carbon dioxide reduction: a density functional theory study
Source: Royal Society of Chemistry journal article supplement (doi:10.1039/d2cp00466f), 2022-01-01
Supplement: d2cp00466f1.pdf [file d2cp00466f1.pdf]

## Supplementary Information

# Uncovering the multifaceted roles of nitrogen defects in graphitic carbon nitride for selective photocatalytic carbon dioxide reduction: A density functional theory study

Jie-Yinn Tang,<sup>a</sup> Chen-Chen Er,<sup>a</sup> Lling-Lling Tan,<sup>a</sup> Yi-Hao Chew,<sup>a</sup> Abdul Rahman Mohamed<sup>b</sup> and Siang-Piao Chai<sup>\*a</sup>

<sup>a</sup>*Multidisciplinary Platform of Advanced Engineering, Chemical Engineering Discipline, School of Engineering, Monash University, Jalan Lagoon Selatan, Bandar Sunway, 47500 Subang Jaya, Selangor, Malaysia.*

<sup>b</sup>*Low Carbon Economy (LCE) Group, School of Chemical Engineering, Universiti Sains Malaysia, Engineering Campus, Seri Ampangan, 14300 Nibong Tebal, Pulau Pinang, Malaysia.*

\*Correspondence to: [chai.siang.piao@monash.edu](mailto:chai.siang.piao@monash.edu)

| <b>Contents</b>                               | <b>Pages</b> |
|-----------------------------------------------|--------------|
| Formation Energy of Defects                   | S1           |
| Spatial Distribution of HOMO-LUMO             | S2           |
| CO <sub>2</sub> Adsorption Simulation Details | S3           |
| Gibbs Free Energy Change                      | S7           |

## 1. FORMATION ENERGY OF DEFECTS

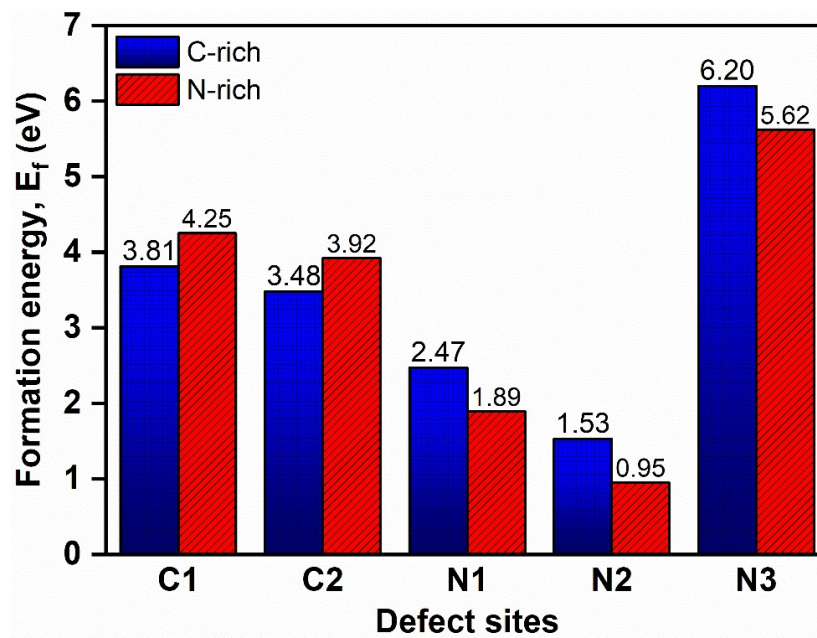

**Fig. S1** Formation energy,  $E_f$  of defects in  $g\text{-C}_3\text{N}_4$  at five potential sites under C-rich and N-rich conditions.

## 2. SPATIAL DISTRIBUTION OF HOMO-LUMO

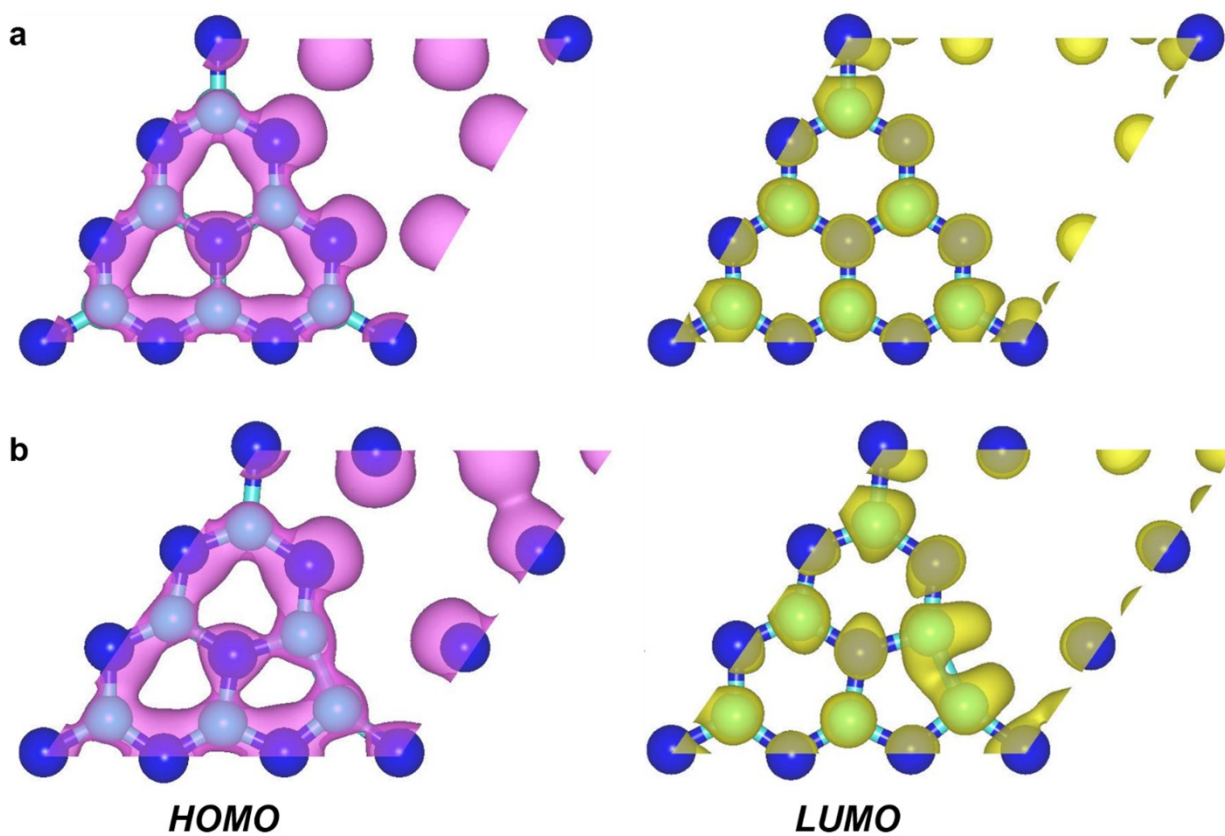

**Fig. S2** Spatial distribution of the highest occupied molecular orbital (HOMO) and lowest unoccupied molecular orbital (LUMO) of (a) GCN and (b)  $D_{N_2}$ . The isosurface value is set to  $0.03 \text{ e}/\text{\AA}^3$ .

### 3. CO<sub>2</sub> ADSORPTION SIMULATION DETAILS

In this study, nine CO<sub>2</sub> adsorption sites were considered in both parallel and vertical orientations, which were the four atom sites, three bond sites and two interstitial sites. For clarity, the four atom sites were N1, N2, C1 and C2 sites; three bond sites being the intermediate point between C1–N2, N2–C2 and N1–C1 bonds, represented as B1, B2 and B3; lastly, the center of a triazine ring as one interstitial site (I1) and the cavity within the six-fold heptazine ring as another interstitial site (I2). The CO<sub>2</sub> adsorption configurations were illustrated as fixed g-C<sub>3</sub>N<sub>4</sub> atoms in Figs. S3–6 to accurately portray the position of the CO<sub>2</sub> molecule on these structures. Optimization of separation distance between CO<sub>2</sub> molecule and g-C<sub>3</sub>N<sub>4</sub> surface was performed, and the ideal distance was discovered to be at 2.5 Å.

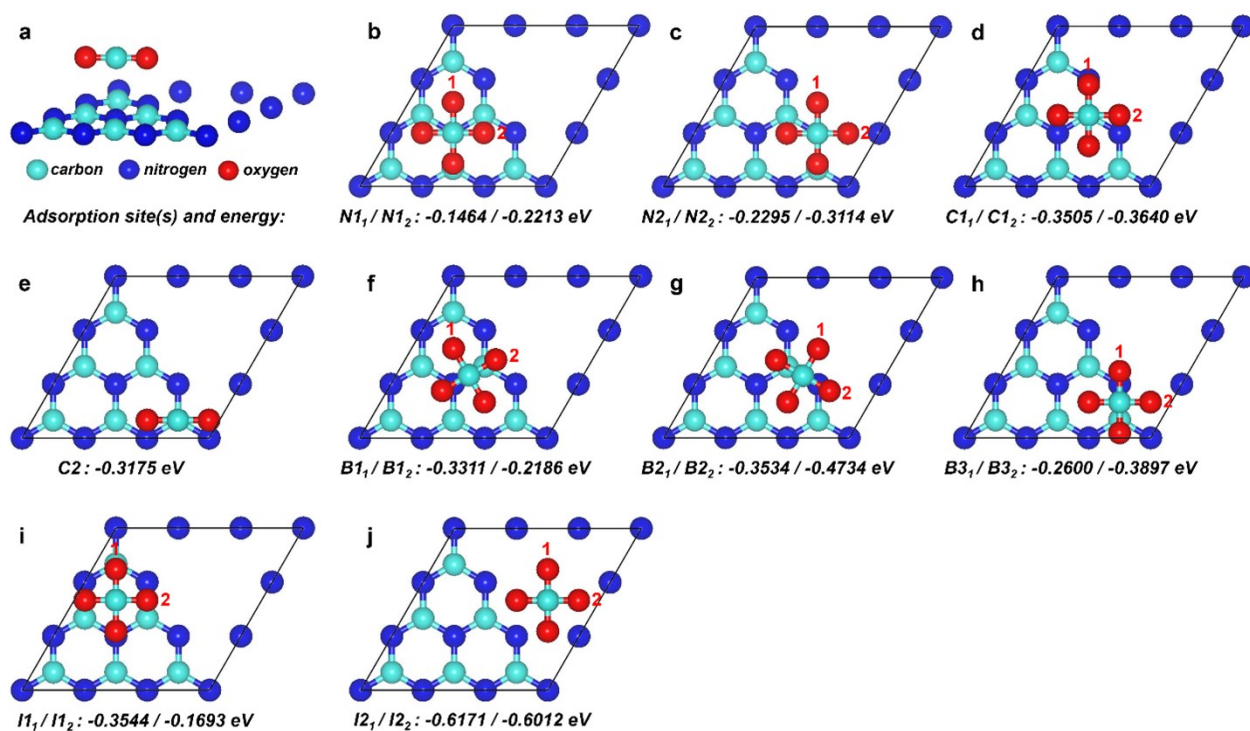

**Fig. S3** (a) Side view of CO<sub>2</sub> molecule adsorbed on GCN in parallel orientation. (b-j) Top view of CO<sub>2</sub> molecule adsorbed on GCN in parallel orientation at different adsorption sites with their corresponding adsorption energy,  $E_{\text{ads}}$ . The number denotes the rotation angle of CO<sub>2</sub> molecule at various points.

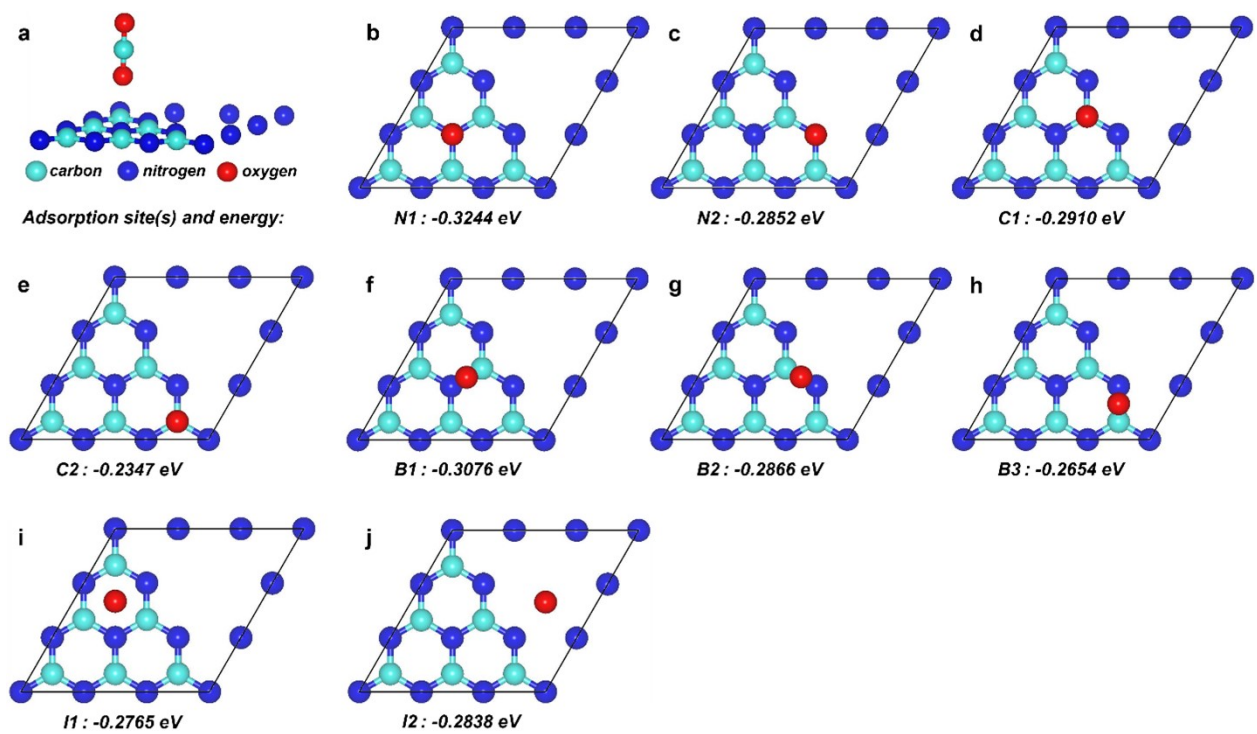

**Fig. S4** (a) Side view of CO<sub>2</sub> molecule adsorbed on GCN in vertical orientation. (b-j) Top view of CO<sub>2</sub> molecule adsorbed on GCN in vertical orientation at different adsorption sites with their corresponding adsorption energy,  $E_{\text{ads}}$ .

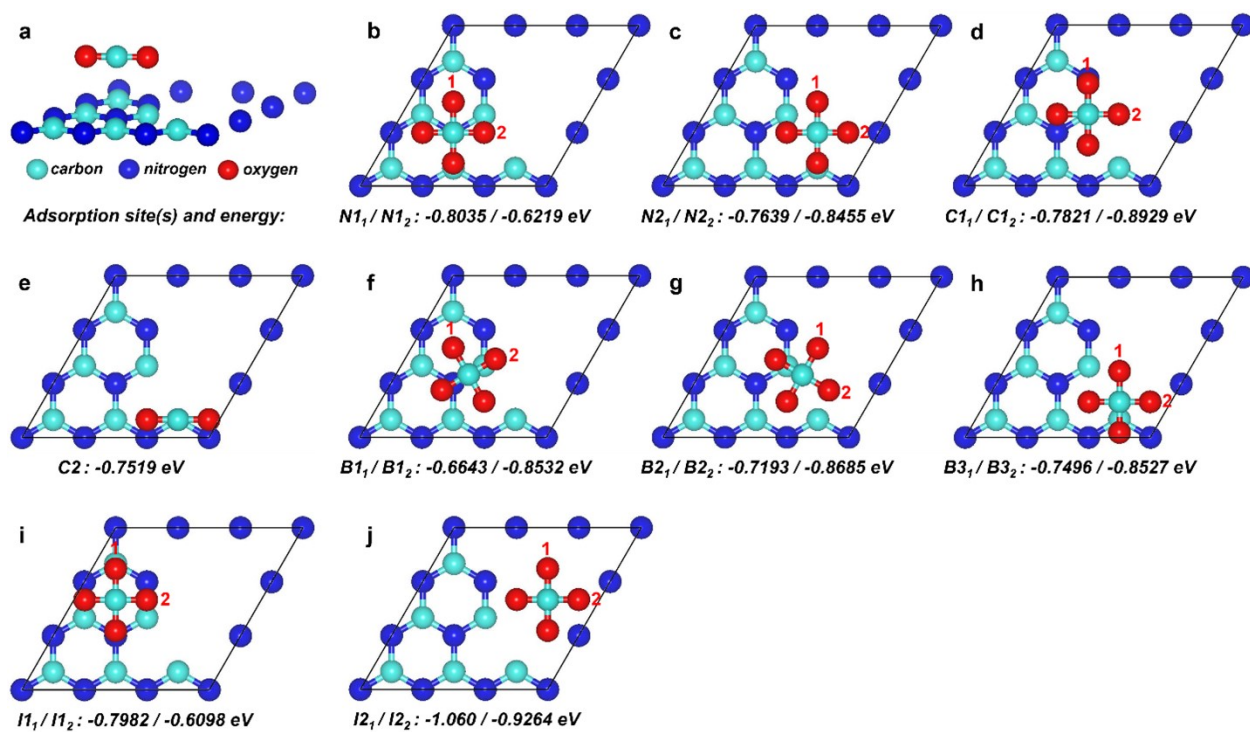

**Fig. S5** (a) Side view of CO<sub>2</sub> molecule adsorbed on D<sub>N2</sub> in parallel orientation. (b-j) Top view of CO<sub>2</sub> molecule adsorbed on D<sub>N2</sub> in parallel orientation at different adsorption sites with their corresponding adsorption energy,  $E_{\text{ads}}$ . The number denotes the rotation angle of CO<sub>2</sub> molecule at various points.

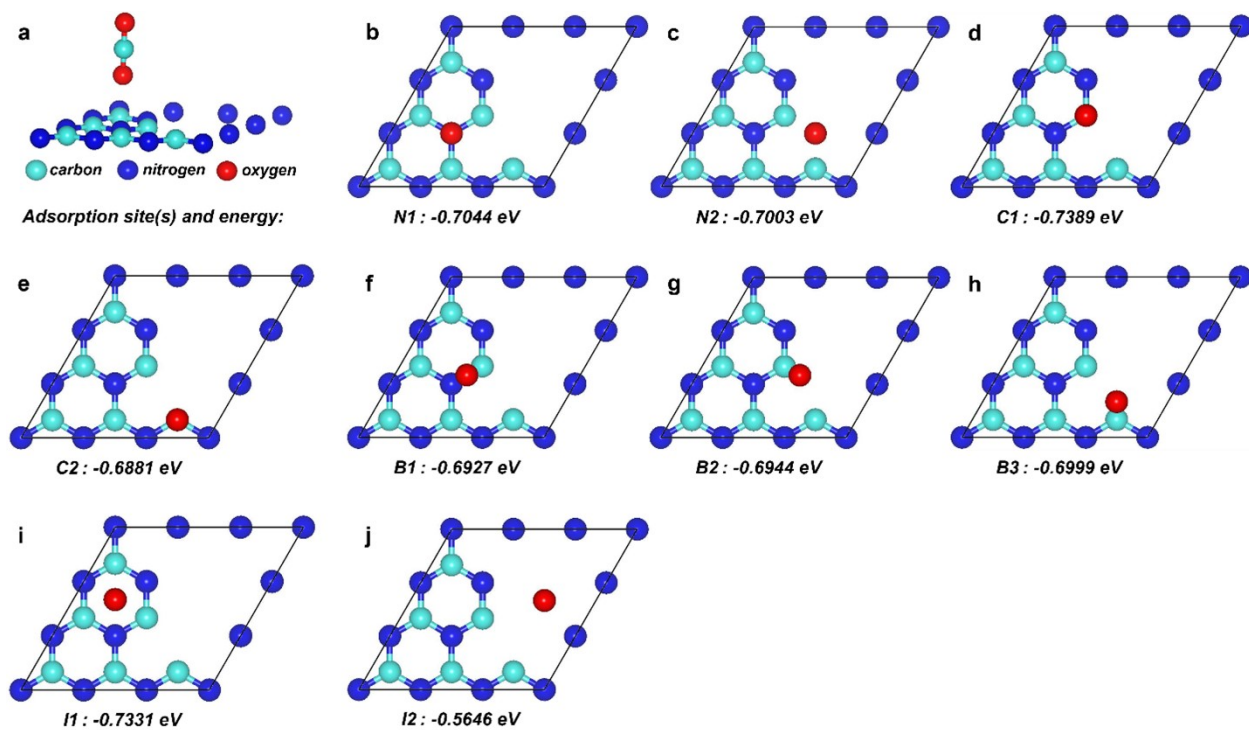

**Fig. S6** (a) Side view of  $\text{CO}_2$  molecule adsorbed on  $\text{D}_{\text{N}_2}$  in vertical orientation. (b-j) Top view of  $\text{CO}_2$  molecule adsorbed on  $\text{D}_{\text{N}_2}$  in vertical orientation at different adsorption sites with their corresponding adsorption energy,  $E_{\text{ads}}$ .

#### 4. GIBBS FREE ENERGY CHANGE

**Table S1** The calculated change in Gibbs free energy of all elementary steps for CO<sub>2</sub> reduction pathways on GCN and D<sub>N2</sub>.

| CO Formation                                               |            |                  |             |            |                 |                  |             |            |
|------------------------------------------------------------|------------|------------------|-------------|------------|-----------------|------------------|-------------|------------|
| Elementary Steps                                           | GCN        |                  |             |            | D <sub>N2</sub> |                  |             |            |
|                                                            | $\Delta E$ | $\Delta E_{ZPE}$ | $T\Delta S$ | $\Delta G$ | $\Delta E$      | $\Delta E_{ZPE}$ | $T\Delta S$ | $\Delta G$ |
| *+ CO <sub>2</sub>                                         | 0.00       | 0.00             | 0.00        | 0.00       | 0.00            | 0.00             | 0.00        | 0.00       |
| CO <sub>2</sub> * + H <sup>+</sup> + e <sup>-</sup>        | 0.32       | 0.01             | 0.33        | 0.64       | -0.44           | 0.01             | 0.33        | -0.12      |
| TS <sub>HCOO</sub> *                                       | 2.11       | 0.26             | 0.51        | 2.36       | 1.53            | 0.26             | 0.51        | 1.78       |
| HCOO*                                                      | 1.64       | 0.00             | 0.11        | 1.74       | 1.07            | 0.00             | 0.11        | 1.17       |
| TS <sub>(CO* + OH*)</sub>                                  | 3.73       | 0.18             | 0.31        | 3.86       | 2.20            | 0.18             | 0.31        | 2.33       |
| CO* + OH*                                                  | 3.29       | 0.11             | 0.19        | 3.37       | 1.75            | 0.11             | 0.19        | 1.83       |
| CO + OH* + H <sup>+</sup> + e <sup>-</sup>                 | 0.46       | 0.05             | 0.30        | 0.71       | -1.22           | 0.05             | 0.30        | -0.97      |
| TS <sub>(CO + H<sub>2</sub>O*)</sub>                       | 3.27       | 0.07             | 0.52        | 3.72       | 1.17            | 0.07             | 0.52        | 1.62       |
| CO + H <sub>2</sub> O*                                     | 0.90       | 0.29             | 0.20        | 0.81       | -0.52           | 0.29             | 0.20        | -0.61      |
| CO + H <sub>2</sub> O + *                                  | 0.79       | 0.19             | 0.24        | 0.84       | -0.98           | 0.19             | 0.24        | -0.93      |
| CH <sub>3</sub> OH Formation                               |            |                  |             |            |                 |                  |             |            |
| Elementary Steps                                           | GCN        |                  |             |            | D <sub>N2</sub> |                  |             |            |
|                                                            | $\Delta E$ | $\Delta E_{ZPE}$ | $T\Delta S$ | $\Delta G$ | $\Delta E$      | $\Delta E_{ZPE}$ | $T\Delta S$ | $\Delta G$ |
| *+ CO <sub>2</sub>                                         | 0.00       | 0.00             | 0.00        | 0.00       | 0.00            | 0.00             | 0.00        | 0.00       |
| CO <sub>2</sub> * + H <sup>+</sup> + e <sup>-</sup>        | 0.96       | 0.01             | 0.33        | 0.64       | 0.20            | 0.01             | 0.33        | -0.12      |
| TS <sub>HCOO</sub> *                                       | 2.61       | 0.26             | 0.51        | 2.36       | 2.03            | 0.26             | 0.51        | 1.78       |
| HCOO*                                                      | 1.84       | 0.00             | 0.11        | 1.74       | 1.27            | 0.00             | 0.11        | 1.17       |
| HCOO* + H <sup>+</sup> + e <sup>-</sup>                    | 1.98       | 0.22             | 0.09        | 2.11       | 0.49            | 0.22             | 0.09        | 0.62       |
| TS <sub>HCOOH</sub> *                                      | 1.88       | 0.61             | 0.24        | 2.25       | 2.53            | 0.61             | 0.24        | 2.90       |
| HCOOH*                                                     | 1.86       | 0.06             | 0.57        | 1.35       | -0.21           | 0.06             | 0.57        | -0.72      |
| HCOOH* + H <sup>+</sup> + e <sup>-</sup>                   | 0.93       | 0.11             | 0.21        | 0.84       | -0.34           | 0.11             | 0.21        | -0.43      |
| TS <sub>(HCO* + H<sub>2</sub>O*)</sub>                     | 2.55       | 0.30             | 0.68        | 2.17       | 2.68            | 0.30             | 0.68        | 2.30       |
| HCO* + H <sub>2</sub> O*                                   | 1.63       | 0.21             | 0.54        | 1.30       | 0.81            | 0.21             | 0.54        | 0.48       |
| HCO* + H <sub>2</sub> O* + H <sup>+</sup> + e <sup>-</sup> | 1.95       | 0.02             | 0.77        | 1.20       | 1.17            | 0.02             | 0.77        | 0.42       |
| TS <sub>(CH<sub>2</sub>O*) + H<sub>2</sub>O*</sub>         | 2.47       | 0.01             | 0.40        | 2.08       | 2.35            | 0.01             | 0.40        | 1.96       |
| CH <sub>2</sub> O* + H <sub>2</sub> O*                     | 2.14       | 0.25             | 0.28        | 2.11       | 1.61            | 0.25             | 0.28        | 1.58       |



| $CH_2O^* + H_2O^* + H^+ + e^-$                                           | 2.23       | 0.24             | 0.54        | 1.93       | 1.34            | 0.24             | 0.54        | 1.04       |
|--------------------------------------------------------------------------|------------|------------------|-------------|------------|-----------------|------------------|-------------|------------|
| $TS_-(CH_2OH^*) + H_2O^*$                                                | 2.97       | 0.23             | 0.23        | 2.97       | 3.40            | 0.23             | 0.23        | 3.40       |
| $CH_2OH^* + H_2O^*$                                                      | 1.03       | 0.04             | 0.38        | 0.70       | 0.11            | 0.04             | 0.38        | -0.22      |
| $CH_2OH^* + H_2O^* + H^+ + e^-$                                          | 1.03       | 0.14             | 0.31        | 0.86       | -0.80           | 0.14             | 0.31        | -0.97      |
| $TS_-(CH_3OH^*) + H_2O^*$                                                | 1.88       | 0.65             | 0.48        | 2.05       | 0.00            | 0.65             | 0.48        | 0.17       |
| $CH_3OH^* + H_2O^*$                                                      | 0.62       | 0.29             | 0.60        | 0.31       | -0.49           | 0.29             | 0.60        | -0.80      |
| $CH_3OH^* + H_2O$                                                        | 0.04       | 0.03             | 0.34        | -0.27      | -1.30           | 0.03             | 0.34        | -1.61      |
| $CH_3OH + H_2O + *$                                                      | -0.18      | 0.06             | 0.18        | -0.30      | -2.00           | 0.06             | 0.18        | -2.12      |
| <b>CH<sub>4</sub> Formation</b>                                          |            |                  |             |            |                 |                  |             |            |
| Elementary Steps                                                         | GCN        |                  |             |            | D <sub>N2</sub> |                  |             |            |
|                                                                          | $\Delta E$ | $\Delta E_{ZPE}$ | $T\Delta S$ | $\Delta G$ | $\Delta E$      | $\Delta E_{ZPE}$ | $T\Delta S$ | $\Delta G$ |
| *+ CO <sub>2</sub>                                                       | 0.00       | 0.00             | 0.00        | 0.00       | 0.00            | 0.00             | 0.00        | 0.00       |
| CO <sub>2</sub> * + H <sup>+</sup> + e <sup>-</sup>                      | 0.56       | 0.41             | 0.33        | 0.64       | -0.20           | 0.41             | 0.33        | -0.12      |
| TS_HCOO*                                                                 | 2.61       | 0.26             | 0.51        | 2.36       | 2.03            | 0.26             | 0.51        | 1.78       |
| HCOO*                                                                    | 1.84       | 0.00             | 0.11        | 1.74       | 1.27            | 0.00             | 0.11        | 1.17       |
| HCOO* + H <sup>+</sup> + e <sup>-</sup>                                  | 1.98       | 0.22             | 0.09        | 2.11       | 0.49            | 0.22             | 0.09        | 0.62       |
| TS_HCOOH*                                                                | 1.88       | 0.61             | 0.24        | 2.25       | 2.53            | 0.61             | 0.24        | 2.90       |
| HCOOH*                                                                   | 1.86       | 0.06             | 0.57        | 1.35       | -0.21           | 0.06             | 0.57        | -0.72      |
| HCOOH* + H <sup>+</sup> + e <sup>-</sup>                                 | 0.93       | 0.11             | 0.21        | 0.84       | -0.34           | 0.11             | 0.21        | -0.43      |
| TS_-(HCO* + H <sub>2</sub> O*)                                           | 2.55       | 0.30             | 0.68        | 2.17       | 2.68            | 0.30             | 0.68        | 2.30       |
| HCO* + H <sub>2</sub> O*                                                 | 1.63       | 0.21             | 0.54        | 1.30       | 0.81            | 0.21             | 0.54        | 0.48       |
| HCO* + H <sub>2</sub> O* + H <sup>+</sup> + e <sup>-</sup>               | 1.95       | 0.02             | 0.77        | 1.20       | 1.17            | 0.02             | 0.77        | 0.42       |
| TS_-(CH <sub>2</sub> O*) + H <sub>2</sub> O*                             | 2.47       | 0.01             | 0.40        | 2.08       | 2.35            | 0.01             | 0.40        | 1.96       |
| CH <sub>2</sub> O* + H <sub>2</sub> O*                                   | 2.14       | 0.25             | 0.28        | 2.11       | 1.61            | 0.25             | 0.28        | 1.58       |
| CH <sub>2</sub> O* + H <sub>2</sub> O* + H <sup>+</sup> + e <sup>-</sup> | 2.23       | 0.24             | 0.54        | 1.93       | 1.34            | 0.24             | 0.54        | 1.04       |
| TS_-(CH <sub>2</sub> OH*) + H <sub>2</sub> O*                            | 2.97       | 0.23             | 0.23        | 2.97       | 3.40            | 0.23             | 0.23        | 3.40       |
| CH <sub>2</sub> OH* + H <sub>2</sub> O*                                  | 1.03       | 0.04             | 0.38        | 0.70       | 0.11            | 0.04             | 0.38        | -0.22      |
| CH <sub>2</sub> OH* + H <sub>2</sub> O + H <sup>+</sup> + e <sup>-</sup> | 3.15       | 0.16             | 0.47        | 2.84       | 1.46            | 0.16             | 0.47        | 1.15       |
| TS_-(CH <sub>2</sub> * + H <sub>2</sub> O*)                              | 4.30       | 0.11             | 0.44        | 3.97       | 2.56            | 0.11             | 0.44        | 2.23       |
| CH <sub>2</sub> * + H <sub>2</sub> O*                                    | 1.51       | 0.43             | 0.35        | 1.59       | -0.05           | 0.43             | 0.35        | 0.03       |
| CH <sub>2</sub> * + H <sub>2</sub> O* + H <sup>+</sup> + e <sup>-</sup>  | 2.13       | 0.03             | 0.52        | 1.64       | 0.19            | 0.03             | 0.52        | -0.30      |

|                               |       |      |      |       |       |      |      |       |
|-------------------------------|-------|------|------|-------|-------|------|------|-------|
| $TS_-(CH_3^*) + H_2O^*$       | 2.77  | 0.24 | 0.28 | 2.73  | 0.80  | 0.24 | 0.28 | 0.76  |
| $CH_3^* + H_2O^*$             | 0.63  | 0.20 | 0.35 | 0.48  | -1.21 | 0.20 | 0.35 | -1.36 |
| $CH_3^* + H_2O^* + H^+ + e^-$ | 0.61  | 0.17 | 0.22 | 0.56  | -1.43 | 0.17 | 0.22 | -1.48 |
| $TS_-(CH_4^*) + H_2O^*$       | 2.00  | 0.00 | 0.29 | 1.71  | -0.01 | 0.00 | 0.29 | -0.30 |
| $CH_4^* + H_2O^*$             | -0.85 | 0.30 | 0.19 | -0.75 | -2.77 | 0.30 | 0.19 | -2.67 |
| $CH_4^* + H_2O$               | -0.70 | 0.10 | 0.22 | -0.82 | -2.74 | 0.10 | 0.22 | -2.86 |
| $CH_4 + H_2O + *$             | -0.67 | 0.13 | 0.30 | -0.84 | -2.74 | 0.13 | 0.30 | -2.91 |
